# Supplementary material for: Facile immobilization of vascular endothelial growth factor on a tannic acid-functionalized plasma-polymerized allylamine coating rich in quinone groups
Source: Royal Society of Chemistry journal article supplement (doi:10.1039/c5ra25917g), 2016-01-01
Supplement: c5ra25917g1.pdf [file c5ra25917g1.pdf]

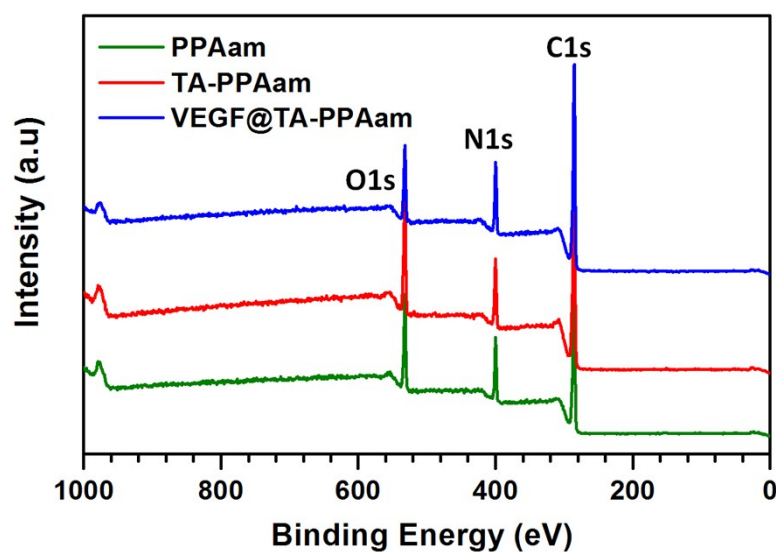

Figure S1. XPS wide-scan survey spectrums of PPAam, TA-PPAam and VEGF@TA-PPAam.

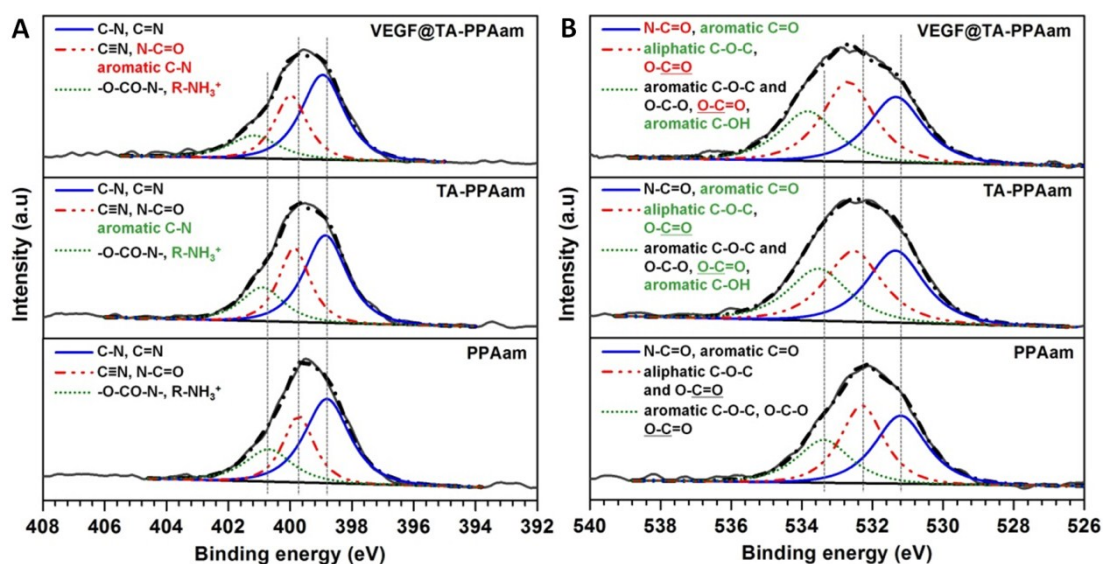

Figure S2. High-resolution spectra of N1s (A) and O1s (B) for PPAam, TA-PPAam and VEGF@TA-PPAam.

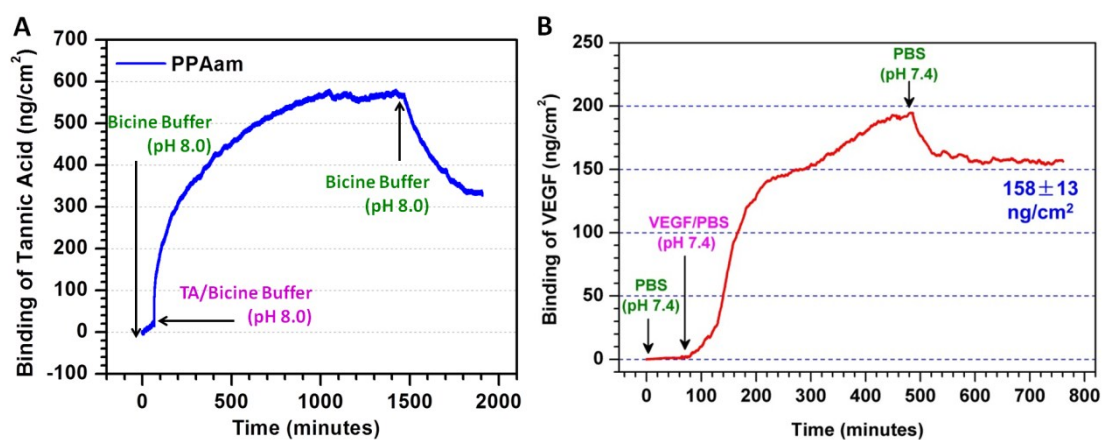

Figure S3. QCM-D analysis of the covalent immobilization of (A) TA to the PPAam surface and (B) VEGF to the TA-PPAam surface.
